# Supplementary material
Source: publisher figshare collection journal article supplement (https://acs.figshare.com/ndownloader/files/3902011)
Supplement: Supplementary file 1 [file 3902011]

Key residues for the light-regulation of the blue light activated adenylyl cyclase (bPAC) from

*Beggiatoa sp.*

Manuela Stierl<sup>1</sup>, Alfons Penzkofer<sup>2</sup>, John TM Kennis<sup>3</sup>, Peter Hegemann<sup>1</sup> & Tilo Mathes<sup>1,3</sup>

<sup>1</sup> Institut für Biologie/Experimentelle Biophysik, Humboldt Universität zu Berlin,  
Invalidenstrasse 42, D-10115 Berlin, Germany

<sup>2</sup> Fakultät für Physik, Universität Regensburg, Universitätsstrasse 31, D-93053 Regensburg,  
Germany

<sup>3</sup> Department of Exact Sciences / Biophysics, Vrije Universiteit, De Boelelaan 1081A, 1081 HV  
Amsterdam, The Netherlands

### Supporting Information

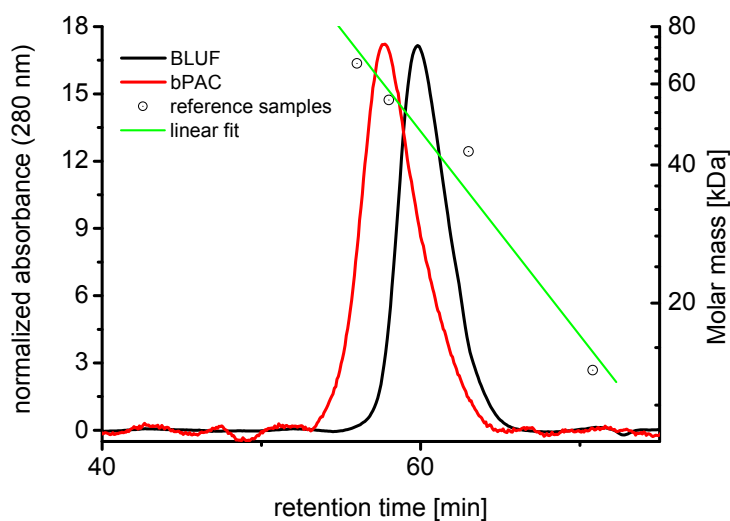

**Figure S1.** Size exclusion chromatography of bPAC and bPAC-BLUF. Protein samples were applied to a Superose 6 10/300 GL column (GE healthcare) at 0.3 ml/min and detected by

absorption at 280 nm using an Äkta prime setup (GE healthcare). Calibration was performed using bovine serum albumin, ovalbumin, alpha-amylase and lysozyme (Sigma-Aldrich). Full-length bPAC accordingly appears at an apparent molecular weight of ~60 kDa, the bPAC BLUF domain at ~45 kDa. The expected molecular weight of full-length protein and BLUF domain in dimeric form are 80 kDa and 35 kDa, respectively. Given the apparent size being strongly dependent on the hydrodynamic radius we consider both proteins to be in dimeric form.

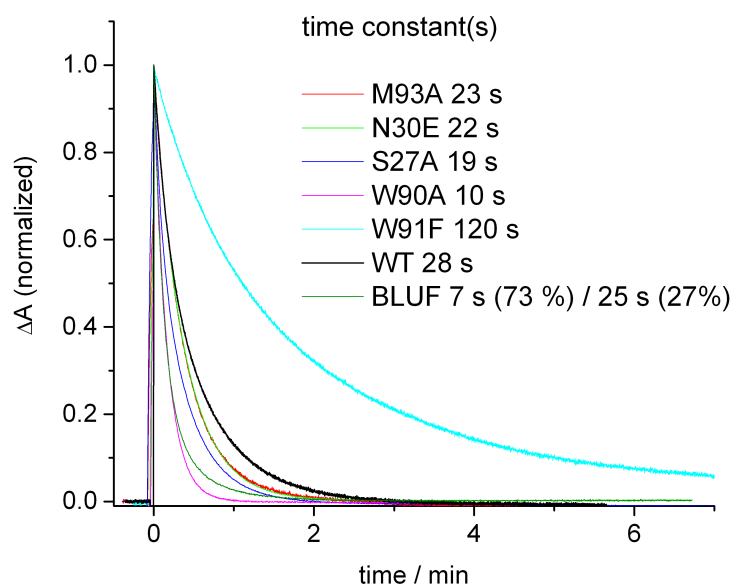

**Figure S2.** Absorbance change at 490 nm after blue light illumination. The time dependent decay of the absorption is fitted with a mono- or bi-exponential decay function with the indicated lifetime(s).

**Table S1.** Enzymatic activity of bPAC and mutants in light and dark (nmol cAMP min<sup>-1</sup> mg protein<sup>-1</sup>). Additionally the dark activities of bPAC and S27A are given for 5 times higher protein concentration\*.

| <b>Protein</b> | <b>Dark</b> | <b>Light</b> | <b>St. deviation<br/>Dark</b> | <b>St. deviation<br/>Light</b> |
|----------------|-------------|--------------|-------------------------------|--------------------------------|
| <b>cyc</b>     | 18          | n. d.        | 5                             | n. d.                          |
| <b>bPAC</b>    | 121         | 2008         | 30                            | 286                            |
| <b>W91A</b>    | 370         | 993          | 181                           | 417                            |
| <b>W91F</b>    | 1157        | 1842         | 142                           | 142                            |
| <b>M93A</b>    | 1589        | 2821         | 122                           | 140                            |
| <b>Q49A</b>    | 1010        | 1781         | 404                           | 192                            |
| <b>Y7F</b>     | 1817        | 1237         | 405                           | 338                            |
| <b>N30E</b>    | 319         | 2842         | 119                           | 97                             |
| <b>S27A</b>    | 134         | 2087         | 14                            | 11                             |
| <b>*bPAC</b>   | 99          | n.d.         | 10                            | n.d.                           |
| <b>*S27A</b>   | 38          | n.d.         | 1                             | n.d.                           |
